# **Are Suboptimal *in utero* Conditions Associated with Obesity and Cardiometabolic Risk Factors in Caucasian children?**

## **Running title: Pregnancy, childhood obesity and metabolic health**

Soraya Saidj<sup>1</sup>, Melanie Henderson<sup>2,3</sup>, Stephanie-May Ruchat<sup>4</sup>, Gilles Paradis<sup>5</sup>, Andraea Van Hulst<sup>6</sup>, Michael Zappitelli<sup>7</sup>, Marie-Eve Mathieu<sup>1,2</sup>

<sup>1</sup>School of Kinesiology and Physical Activity Sciences, Université de Montréal, Montréal, QC, Canada; <sup>2</sup>Research Center, Sainte-Justine University Hospital, Montréal, Qc, Canada; <sup>3</sup>Department of Pediatrics, Université de Montréal, Montréal, Qc, Canada; <sup>4</sup>Department of Human Kinetics, Université du Québec à Trois-Rivières, Trois-Rivières, QC, Canada; <sup>5</sup>Department of Epidemiology, Biostatistics, and Occupational Health, McGill University, Montréal, Qc, Canada; <sup>6</sup>Ingram School of Nursing, McGill University, Montréal, Qc, Canada; <sup>7</sup>Department of Pediatrics, Division of Nephrology, Hospital for Sick Children, University of Toronto, Toronto, ON, Canada.

### **Corresponding author:**

Marie-Eve Mathieu

me.mathieu@umontreal.ca

École de kinésiologie et des sciences de l'activité physique, Université de Montréal,

CEPSUM 2100, boul. Édouard-Montpetit, Bureau 8202,

Montréal (Canada) H3T 1J4

### **Authors disclosure statement**

No competing financial interests exist.

## Abstract

**Objective:** To explore the association between *in utero* exposure to suboptimal gestational factors (SGF; gestational diabetes mellitus, hypertensive disorders during pregnancy, maternal smoking during pregnancy), childhood obesity, and cardiometabolic risk factors. **Methods:** Data were obtained from the “Quebec Adiposity and Lifestyle Investigation in Youth” longitudinal study (QUALITY) composed of 630 Caucasian children recruited at age 8–10 (first visit V1; n=619) and followed-up 2 years later (V2; n=557). Simple logistic regression models were used. **Results:** In the cohort, maternal smoking during pregnancy was associated with higher odds of obesity (OR1=2.00, 95% CI 1.25-3.20, OR2=2.29, 95% IC 1.26-4.16) at both visit and with high waist circumference (OR1=1.96, 95% IC 1.24-3.1) at V1. Hypertensive disorders during pregnancy were associated with higher odds of obesity (OR1=2.37, 95% CI 1.17-4.80) at visit 1. Joint exposure to SGF was associated with higher odds of high waist circumference (OR1=1.42, 95% CI 1.06-1.91) at V1, obesity (OR2= 1.63, 95% IC 1.153-2.32) at V2 and low level of HDL (OR2=1.45, 95% IC 1.04-2.03) at V2. Analysis’ stratification by sex revealed that boys were more adversely affected by exposure to combined SGF while girls were more affected by exposure to maternal smoking during pregnancy. **Conclusion:** *In utero* exposure to an independent or combined SGF is associated with adverse adipose and cardiometabolic profiles in children, with sex specificities.

**Keywords:** Children, obesity, pregnancy, cardiometabolic risk factors.

## Introduction

Childhood obesity has been attributed to an interaction of genetic and non-genetic factors such as a shift toward a less active lifestyle<sup>1</sup> and low-nutrient, energy-dense diets<sup>2</sup>. Prenatal and possibly pre-conceptual factors may also play a role. According to Barker's theory of "*Developmental Origins of Health and Disease*" (DOHaD)<sup>3</sup>, an adverse environment early during development, and particularly during intrauterine life, can result in permanent changes in fetus physiology and metabolism, with higher risks of later cardiometabolic diseases.

Offspring exposed to gestational diabetes mellitus (GDM) are more likely to be overweight or obese<sup>4</sup> and to present components of the metabolic syndrome in childhood<sup>5</sup> and early adolescence<sup>6</sup>. According to Clausen *et al.* (2009)<sup>7</sup>, the risk of metabolic syndrome in adulthood is four-fold higher in a population exposed to GDM when compared with the general population. Similarly, offspring exposed to maternal hypertension during pregnancy are more likely to have high blood pressure during childhood<sup>8</sup> and adolescence<sup>9</sup> and to be overweight or obese in childhood<sup>10</sup>. A third factor of interest is maternal smoking during pregnancy. Offspring exposed to maternal smoking during pregnancy are more susceptible to be obese during childhood<sup>11</sup>, adolescence and young adulthood<sup>12</sup>, and to display higher level of triglycerides and a lower level of high-density lipoprotein (HDL)<sup>13</sup> compared to the non-exposed population. The association between suboptimal gestational factors (SGF) (GDM, hypertensive disorders of pregnancy, maternal smoking during pregnancy), obesity and cardiometabolic risk factors in children between age 8-10 and 10-12 years is to be

confirmed. In addition, the association between joint exposure to SGF and obesity, as well as cardiometabolic risk factors during childhood remains to be established. This study aimed to explore, in a cohort of Caucasian children aged 8–10 (late childhood) at baseline and followed at 10–12 years of age (pubertal onset), the association between independent and joint exposure to SGF, obesity and cardiometabolic risk factors.

## **Methods**

### **Population**

This prospective study used data from the QUebec Adiposity and Lifestyle Investigation in Youth (QUALITY) study designed to increase understanding of the natural history of excess body weight and its associated cardiometabolic consequences in Caucasian youth at risk for the development of obesity (<http://www.etudequalitystudy.ca>)<sup>14</sup>. Data from a sample of 630 children aged 8–10 years at baseline (Visit 1 [V1]; 2005–2008) of which 564 were followed 2 years later (Visit 2 [V2]) were used. Inclusion criteria were for children to have at least one obese biological parent (i.e., body mass index (BMI)  $\geq$  30 kg/m<sup>2</sup> and/or a waist circumference of at least 88 cm for women or 102 cm for men). Exclusion criteria for children were to have type 1 or 2 diabetes; to have antihypertensive medications or steroids use; to follow a very strict diet (i.e., <600 kcal/day); to have a previous diagnosis of a serious illness, a psychological condition, or a cognitive disorder that precluded participation. The current analysis is restricted to children who were reported to be non-exposed to type 1 or 2 diabetes during pregnancy (pre-gestational diabetes) considering the differences in medical care, maternal and fetal outcomes with these two medical conditions<sup>15</sup>. The QUALITY study was approved by the Ethics

Review Boards of the Sainte-Justine University Hospital Center and Québec Heart and Lung Institute. Written informed parental consent and child assent were obtained.

### **Suboptimal gestational factors**

Data on maternal health conditions during pregnancy (i.e. GDM, hypertensive disorders during pregnancy, and maternal smoking during pregnancy) were collected using a self-administered questionnaire to parents which is known to be a validated approach. In the questionnaire, parents had to answer “yes” or “no” or “I don’t know” to the following questions “did the mother had/ was diagnosed for gestational diabetes during her pregnancy?”, “Was the mother diagnosed for hypertension during pregnancy?” and “Did the mother smoke during her pregnancy?”. Joint exposure to SGF was defined as the number of SGF to which the child was exposed to during pregnancy (0, 1, 2 or 3). Joint exposure to SGF included one of the following SGF: GDM, hypertensive disorders during pregnancy or maternal smoking during pregnancy when coded for 1, a combination of two of these factors when coded for 2 (GDM and hypertensive disorders during pregnancy or GDM and maternal smoking during pregnancy or hypertensive disorders during pregnancy and maternal smoking during pregnancy) and a combination of the three factors when coded for 3.

### **Anthropometric measures and obesity diagnosis**

All anthropometric measures were obtained using standardized methods. Height was measured twice using a calibrated stadiometer (Ibiom, model 600, Ibiom Instruments Ltée, Sherbrooke, Quebec, Canada at Sainte-Justine Hospital and Medical Scales and Measuring Devices Seca Corp., Hanover, Maryland, USA at Quebec Heart and Lung

Institute). Body weight was measured with a calibrated electronic balance at Sainte-Justine's hospital (Cardinal Detecto, 758C Series, Cardinal Scale Manufacturing Co., Webb City, Missouri, USA) and at the Laval hospital (Tanita, model TBF-300A, Arlington Heights, Illinois, USA). Waist circumference was measured twice to the closest 0.1cm at the midpoint between the lower margin of the least palpable rib and the top of the iliac crest using a calibrated length measuring tape. High waist circumference was determined at or above the 90<sup>th</sup> percentiles using the International Diabetes Federation (IDF) consensus statement<sup>16</sup>.

Obesity definition is based on BMI for age and sex. BMI percentile for age and sex is computed and interpreted using the Centers for Disease Control and Prevention age and sex-specific reference norms<sup>17</sup>. Obesity is defined as a BMI at or above the 95<sup>th</sup> percentile for children and teens of the same age and sex<sup>18</sup>.

### **Cardiometabolic risk factors**

The current definition of metabolic syndrome in childhood by the IDF consensus statement of 2007 was used<sup>16</sup>. A definition still used as a reference today<sup>19</sup>. It proposes that metabolic syndrome in children greater than 10 years of age can be diagnosed by the presence of central abdominal obesity and two or more clinical features: elevated triglycerides, low level of HDL, hypertension, and increased plasma glucose<sup>16</sup>. Blood pressure was measured on the right arm, using a size-appropriate cuff, after a 5-minute rest, in a seated position using an oscillometric instrument (Dinamap XL, model CR9340, Critikon Company, FL, USA). Five consecutive readings were recorded and the mean value of the last three readings was used to define systolic and diastolic blood pressure.

Hypertension was diagnosed if systolic  $\geq 130$  and diastolic  $\geq 85$  mm Hg<sup>16</sup>. Blood samples were obtained by venipuncture after an overnight fast by a trained nurse. Analyses were performed in batches at Sainte-Justine hospital's clinical biochemistry laboratory twice monthly. Fasting hyperglycemia was diagnosed if fasting glycemia  $\geq 5.6$  mmol/L<sup>16</sup>. Adverse lipid profile was diagnosed if HDL was  $< 1.03$  mmol/L or if triglycerides  $\geq 1.7$  mmol/L<sup>16</sup>.

### **Statistical analysis**

The sample was described using means and percentages. Simple logistic regression was used to investigate the association between each dichotomous independent variable (GDM, hypertensive disorders during pregnancy and maternal smoking during pregnancy), obesity as well as cardiometabolic risk factors (Waist circumference, level of HDL cholesterol, fasting glycemia, triglycerides, and blood pressure). Simple logistic regression was used to investigate the association between categorical variable "joint exposure to SGF" (0 for non-exposure, 1 factor, 2 factors and 3 factors), obesity as well as cardiometabolic risk factors. Analyses were adjusted for parental education, and models for systolic as well as diastolic blood pressure were adjusted for height at outcome measurement. Simple logistic regression was also used to explore the association between exposure to a categorical variable "dyad of SGF" (GDM and hypertensive disorders during pregnancy, GDM and maternal smoking during pregnancy or hypertensive disorders during pregnancy and maternal smoking during pregnancy), obesity and cardiometabolic risk factors in the cohort. Analyses for dyads of SGF were adjusted for covariates (birth weight, breastfeeding, sex, parental education, Tanner

stage) with  $p < 0.2$ . Associations with  $p < 0.05$  (95% CI) were considered significant. Data were analyzed using SPSS version 24 (IBM Corp. 2012. IBM SPSS Statistics for Windows, Armonk, NY, USA), and covariate-adjusted associations are reported.

### **Adjusted variables**

Parental education<sup>20</sup> could be associated with obesity in children and was controlled for in the analysis. Data about parental education were collected using a self-administered questionnaire to parents.

### **Results**

Age, sex, anthropometric measures, exposure to SGF and cardiometabolic risk factors for V1 and V2 are described in Table 1. From the initial sample of 630 (V1) and 564 (V2), 11 (V1) and 7 (V2) children were excluded from the study due to reported diabetes in the mother before pregnancy. The analytic samples of 619 for V1 and 557 for V2 were used. Age, gender, parent's education level, did not differ between children who were presents at both visits and children lost to follow-up (data not presented).

### **Visit 1 and Visit 2**

In the cohort (boys and girls combined), at age 8–10 (V1), hypertensive disorders during pregnancy were associated with 137% higher odds of obesity (OR=2.37, 95% CI 1.17-4.80) (Figure1). Maternal smoking during pregnancy was positively associated with 100% higher odds of obesity (OR=2.00, 95% CI 1.25-3.20) and 96% higher odds of high waist circumference (OR=1.96, 95% IC 1.29-5.17) (Table3) (Figure1). Joint exposure to SGF was associated with 37% higher odds of high waist circumference (OR=1.37, 95% CI 1.01-1.86) at V1(Table 3) (Figure1). At age 10-12 years, maternal smoking during pregnancy was positively associated with 129% higher odds of obesity (OR=2.29, 95%



IC 1.26-4.16) (Table 4) (Figure1). Joint exposure to SGF was positively associated with 63% higher odds of obesity (OR=1.63, 95% CI 1.153-2.327) (Table 4) (Figure1) and 45% higher odds of low level of HDL (OR=1.45, 95% CI 1.04-2.03) (Table 5) (Figure1). Comparison between odd ratios of significant associations at age 8-10 (V1) which persisted at age 10-12 (V2) showed no significant difference.

### **Stratified analyses: Boys and girls**

In boys, at age 8-10 years (V1), hypertensive disorders during pregnancy were positively associated with 158% higher odds of high waist circumference (OR=2.58, 95% CI 1.29-5.17) (Table 3) (Figure1). Joint exposure to SGF was positively associated with 51% higher odd of low level of HDL (OR=1.51, 95% CI 1.03-2.22) (Table 3) (Figure1). At age 10-12 years (V2), joint exposure to SGF was positively associated with 73% higher odd of obesity (OR=1.73, 95% CI 1.11-2.71) (Table 4) (Figure1).

In girls, at age 8-10 years (V1), maternal smoking during pregnancy was positively associated with 167% higher odd of obesity (OR=2.67, 95% IC 1.30-5.51) (Table 2) (Figure1) and 187% higher odd of high waist circumference (OR=2.87, 95%IC 1.41-1.91) (Table 3) (Figure1). At age 10-12 (V2), maternal smoking during pregnancy was positively associated with 187% higher odd of obesity (OR=2.87, 95%IC 1.17-7.03) (Table 4) (Figure1).

### **Discussion**

A deleterious in-utero environment is suspected to play a role in cardiometabolic risk factors in childhood<sup>21</sup> and cardiovascular events in adulthood<sup>22</sup>. The results of the present study reveal that joint exposure to SGF during pregnancy is positively associated with

obesity and adverse cardiometabolic profile in Caucasian children. Moreover, independent SGF such as maternal smoking during pregnancy and hypertensive disorders during pregnancy are positively associated with an adverse adipose profile in children. Interestingly, some results appeared to be sex specific and associations persisting with increasing age.

### **Joint exposure to SGF**

To the best of our knowledge, the present study is the first to consider joint exposure to SGF during pregnancy and their association with childhood overweight, obesity and cardiometabolic risk factors. The pathophysiological mechanisms through which combined SGF of interest in the present study interact and influence offspring's health are still not understood. The present study found that joint exposure to SGF was positively associated with a higher odds of obesity, high waist circumference and low level of HDL in the cohort and in boys at age 8-10 and 10-12 but not in girls. Taken together, these results suggest that a joint exposure to SGF results in adverse effects which may be more important in boys than in girls and persist as children age. These findings are consistent with a recent study by Li et al (2017)<sup>23</sup>. This study investigated the impact of GDM on children aged 9-14 years old, and found that boys were more likely to be obese than girls if exposed to GDM during pregnancy. It also suggested that girls display a delayed response to prenatal exposure to GDM, with adverse body weight occurring at the beginning of adulthood. The mechanisms underlying the sex difference in adipose and metabolic outcomes in children are not well understood. Nevertheless, it is possible that boys and girls have different development when exposed to combined SGF,

with girls being more resilient than boys. Murphy and al.'s study on maternal asthma and offspring's birth weight also highlighted sex differences. In their study, they showed that boys did not have a reduced birth weight when exposed to mild maternal asthma during pregnancy, while girls had a reduced birth weight<sup>24</sup>. Boys showed signs of compromise only when exposed to an acute maternal asthma exacerbation in utero<sup>25</sup>. These results possibly suggest that boys, contrary to girls, are more sensitive to an adverse gestational environment and this, when the SGF is exacerbated or is combined with other SGF, and begin displaying adverse adipose and metabolic profiles during childhood.

### **Maternal smoking during pregnancy**

Cigarette's smoking during pregnancy is suspected to cause alterations in the placental barriers structures<sup>26</sup> leading to later cardiovascular health issues in offspring<sup>27</sup>. In the present study, maternal smoking during pregnancy was associated with an increasing risk of obesity in the cohort and in girls at age 8-10 and 10-12 years. It was also associated with increasing risk of high waist circumference in the cohort at age 8-10 years in the cohort. These results therefore suggest that girls are possibly more affected than boys by maternal smoking during pregnancy. Li *et al.* (2016) also found in a Portuguese cohort aged 3–10 years that exposure to maternal smoking during pregnancy increased BMI with age, but no sex specification was given<sup>28</sup>. Shi *et al.* (2013) assessed the potential association of maternal smoking during pregnancy with obesity among Canadian children aged 6–11<sup>29</sup>. They found that it was boys and not girls who were more likely to be obese but did not discuss this sex difference. A possible explanation to our results could be that girls' early adipose tissue development has been more altered than boys, leading to later

obesity. This hypothesis is supported by studies on rats where nicotine altered lipolysis and lipogenesis by inducing a leptin resistance in adipose tissue and liver of female rats, leading to later overweight and metabolic consequences<sup>30</sup>. Another hypothesis justifying the sex difference in this finding could be that the sensitivity in girls and boys toward cigarette's components is different. Further studies are yet to be done to investigate these hypotheses considering that in Canada, 20% to 30% of female smokers continue through pregnancy<sup>31</sup>.

### **Hypertensive disorders during pregnancy**

Hypertensive disorders during pregnancy represent an important worldwide cause of maternal and neonatal mortality<sup>32</sup>. In high-income countries, gestational hypertension and pre-eclampsia are respectively associated with 30% and 3% increased risk of newborn stillbirth<sup>33</sup>. These pregnancy complications are also known to cause growth restriction<sup>34</sup>, a risk factor for later cardiovascular diseases, blood pressure disorders<sup>35</sup>, and a higher BMI in children<sup>36</sup>. In the present study, maternal hypertensive disorders during pregnancy were positively associated with obesity in the cohort at age 8-10 (V1) and a high waist circumference in boys at age 8–10 (V1). Similar results were found in a systematic review by Davis et al (2012) with 45 249 children and adolescents, where prenatal exposure to preeclampsia was positively associated with higher odd of higher BMI in both children and adolescents<sup>37</sup>. According to the current literature, the association between hypertensive disorders during pregnancy and childhood obesity goes through a small birth weight for gestational age<sup>38</sup>. Nevertheless, our findings support that the effects of hypertensive disorders during pregnancy potentially go beyond small birth

weight for gestational age, given that our statistical analysis found that birthweight was not associated with obesity and cardiometabolic risk factors such as high waist circumference in children. It can be speculated that fetus' adaptive response to a preeclamptic intrauterine environment results in epigenetic changes that appear later in life, thereby leading to overweight<sup>39</sup>. Another possibility is that heritable genetic factors that predispose to pregnancy hypertensive disorders such as maternal obesity<sup>40</sup> are inherited by the offspring<sup>21</sup>.

### **Strengths and limitations**

This is the first study to examine cross-sectionally the association between adipose profile and cardiometabolic risk factors and three SGF individually and in combination. It is also reinforced by objective assessment of children's health. However, the current study was limited by a lack of data on maternal pre-pregnancy BMI and gestational weight gain, both known to have an impact on obesity risk in children<sup>42</sup> and adolescents<sup>43</sup>. Another limiting factor is that metabolic syndrome criteria are defined starting 10 years of age but we applied them starting at 8 years. The present study also lacked statistical power to analyse cardiometabolic risk factors such as fasting hyperglycemia, and triglycerides due to small sample size.

### **Conclusion**

The results of this study suggest that intrauterine exposure to only maternal smoking, a joint of SGF (GDM, hypertensive disorders during pregnancy, and maternal smoking during pregnancy) with higher odds of a deleterious adipose and cardiometabolic profile in Caucasian children. A more marked association of the joint exposure to SGF is found

for boys' obesity, waist circumference and lipid profile. Moreover, exposure to an independent factor (i.e. maternal smoking during pregnancy, hypertensive disorders during pregnancy) was associated with an adverse adipose profile in children with sex specificities. Consequently, these results suggest that there may be a sex difference in the fetal adaptive mechanisms to a deleterious gestational environment. More research is warranted to explore the key role of intrauterine life on children's health.

### **Funding/Support**

The QUALITY cohort is funded by the Canadian Institutes of Health Research (#OHF-69,442, #NMD-94,067, #MOP-97,853, #MOP-119,512), the Heart and Stroke Foundation of Canada (#PG-040291) and Fonds de la Recherche en Santé du Québec. Mélanie Henderson and Marie-Ève Mathieu respectively hold Fonds de Recherche en Santé du Québec Junior 2 and 1 salary awards.

### **Acknowledgements**

Dr. Marie Lambert (July 1952—February 2012), pediatric geneticist and researcher, initiated the QUALITY cohort. Her leadership and devotion to QUALITY will always be remembered and appreciated. The cohort integrates members of TEAM PRODIGY, an inter-university research team including Université de Montréal, Concordia University, Centre INRS—Institut Armand-Frappier, Université Laval, and McGill University. The research team is grateful to all the children and their families who took part in this study, as well as the technicians, research assistants, and coordinators involved in the

QUALITY cohort project. We are also grateful to Miguel Chagnon for his help with statistical analyses.

## References

1. Janssen I, Katzmarzyk PT, Boyce WF, King MA, Pickett W. Overweight and obesity in Canadian adolescents and their associations with dietary habits and physical activity patterns. *J Adolesc Health* 2004;35:360-7.
2. Braithwaite I, Stewart AW, Hancox RJ, et al. Fast-food consumption and body mass index in children and adolescents: an international cross-sectional study. *BMJ Open* 2014;4:e005813.
3. Barker DJ. Sir Richard Doll Lecture. Developmental origins of chronic disease. *Public Health* 2012;126:185-9.
4. Nilsson C, Carlsson A, Landin-Olsson M. Increased risk for overweight among Swedish children born to mothers with gestational diabetes mellitus. *Pediatr Diabetes* 2014;15:57-66.
5. Boney CM, Verma A, Tucker R, Vohr BR. Metabolic syndrome in childhood: association with birth weight, maternal obesity, and gestational diabetes mellitus. *Pediatrics* 2005;115:e290-6.
6. Vaarasmaki M, Pouta A, Elliot P, et al. Adolescent manifestations of metabolic syndrome among children born to women with gestational diabetes in a general-population birth cohort. *Am J Epidemiol* 2009;169:1209-15.
7. Clausen TD, Mathiesen ER, Hansen T, et al. Overweight and the metabolic syndrome in adult offspring of women with diet-treated gestational diabetes mellitus or type 1 diabetes. *J Clin Endocrinol Metab* 2009;94:2464-70.
8. Wen X, Triche EW, Hogan JW, Shenassa ED, Buka SL. Prenatal factors for childhood blood pressure mediated by intrauterine and/or childhood growth? *Pediatrics* 2011;127:e713-21.
9. Fraser A, Nelson SM, Macdonald-Wallis C, Sattar N, Lawlor DA. Hypertensive disorders of pregnancy and cardiometabolic health in adolescent offspring. *Hypertension* 2013;62:614-20.
10. Zheng JS, Liu H, Ong KK, et al. Maternal Blood Pressure Rise During Pregnancy and Offspring Obesity Risk at 4 to 7 Years Old: The Jiaying Birth Cohort. *J Clin Endocrinol Metab* 2017;102:4315-22.
11. Koshy G, Delpisheh A, Brabin BJ. Dose response association of pregnancy cigarette smoke exposure, childhood stature, overweight and obesity. *Eur J Public Health* 2011;21:286-91.

12. Dior UP, Lawrence GM, Sitlani C, et al. Parental smoking during pregnancy and offspring cardio-metabolic risk factors at ages 17 and 32. *Atherosclerosis* 2014;235:430-7.
13. Ayer JG, Belousova E, Harmer JA, David C, Marks GB, Celermajer DS. Maternal cigarette smoking is associated with reduced high-density lipoprotein cholesterol in healthy 8-year-old children. *Eur Heart J* 2011;32:2446-53.
14. Lambert M, Van Hulst A, O'Loughlin J, et al. Cohort profile: the Quebec adipose and lifestyle investigation in youth cohort. *Int J Epidemiol* 2012;41:1533-44.
15. Shand AW, Bell JC, McElduff A, Morris J, Roberts CL. Outcomes of pregnancies in women with pre-gestational diabetes mellitus and gestational diabetes mellitus; a population-based study in New South Wales, Australia, 1998-2002. *Diabet Med* 2008;25:708-15.
16. International Diabetes Federation. Consensus definition of metabolic syndrome in children and adolescents. 2007. (<https://www.idf.org/e-library/consensus-statements/61-idf-consensus-definition-of-metabolic-syndrome-in-children-and-adolescents.html>).
17. Anthropometric Reference Data for Children and Adults : U United States, 2007–2010, 2012. ([https://www.cdc.gov/nchs/data/series/sr\\_11/sr11\\_252.pdf](https://www.cdc.gov/nchs/data/series/sr_11/sr11_252.pdf)).
18. Center for Disease Control. Defining Childhood Obesity, 2016. (<https://www.cdc.gov/obesity/childhood/defining.html>).
19. MacPherson M, de Groh M, Ioukine L. Prevalence metabolic syndrome and its risk factors in Canadian children and adolescents: Canadian Health Measures Survey cycle 1 (2007-2009) and Cycle 2 (2009-2011). *Health Promotion and Chronic Disease Prevention in Canada* 2016.
20. Moraeus L, Lissner L, Yngve A, Poortvliet E, Al-Ansari U, Sjoberg A. Multi-level influences on childhood obesity in Sweden: societal factors, parental determinants and child's lifestyle. *Int J Obes (Lond)* 2012;36:969-76.
21. Tam WH, Ma RC, Yang X, et al. Glucose intolerance and cardiometabolic risk in children exposed to maternal gestational diabetes mellitus in utero. *Pediatrics* 2008;122:1229-34.
22. Davis EF, Lewandowski AJ, Aye C, et al. Clinical cardiovascular risk during young adulthood in offspring of hypertensive pregnancies: insights from a 20-year prospective follow-up birth cohort. *BMJ Open* 2015;5:e008136.
23. Li S, Zhu Y, Yeung E, et al. Offspring risk of obesity in childhood, adolescence and adulthood in relation to gestational diabetes mellitus: a sex-specific association. *Int J Epidemiol* 2017;46:1533-41.
24. Murphy VE, Gibson PG, Giles WB, et al. Maternal asthma is associated with reduced female fetal growth. *Am J Respir Crit Care Med* 2003;168:1317-23.
25. Murphy VEPG, Peter MBBS, FRACP; Talbot, Philippa I. GradCertAsthmaEd; Clifton, Vicki L. Severe\_Asthma\_Exacerbations\_During\_Pregnancy.
26. Huuskonen P, Amezaga MR, Bellingham M, I. The human placental proteome is affected by maternal smoking. *Reprod Toxicol* 2016;63:22-31.
27. Power C, Atherton K, Thomas C. Maternal smoking in pregnancy, adult adiposity and other risk factors for cardiovascular disease. *Atherosclerosis* 2010;211:643-8.
28. Li L, Peters H, Gama A, et al. Maternal smoking in pregnancy association with childhood adiposity and blood pressure. *Pediatr Obes* 2016;11:202-9.



29. Yipu Shi MdGaHM. Perinatal and Early Childhood Factors for Overweight and Obesity in Young Canadian Children.
30. Zhang WX, Li YP, Fan J, et al. Perinatal nicotine exposure increases obesity susceptibility by peripheral leptin resistance in adult female rat offspring. *Toxicol Lett* 2018;283:91-9.
31. Health Canada. Pregnancy, 2007. (<https://www.canada.ca/en/health-canada/services/health-concerns/tobacco/smoking-your-body/pregnancy.html>).
32. Duley L. The global impact of pre-eclampsia and eclampsia. *Semin Perinatol*. 2009;33(3):130-7.
33. Flenady V, Koopmans L, Middleton P, Frøen JF, Smith GC, Gibbons K, et al. Major risk factors for stillbirth in high-income countries: a systematic review and meta-analysis. *The Lancet*. 2011; 377 (9774):1331-40.
34. Flenady V, Middleton P, Smith GC, Duke W, Erwich JJ, Khong TY, et al. Stillbirths: the way forward in high-income countries. *The Lancet*. 2011; 377 (9778):1703-17.
35. Zetterstrom K, Lindeberg SN, Haglund B, Hanson U. Chronic hypertension as a risk factor for offspring to be born small for gestational age. *Acta Obstet Gynecol Scand*. 2006; 85 (9):1046-50.
36. Tenhola S, Rahiala E, Halonen P, Vanninen E, Voutilainen R. Maternal preeclampsia predicts elevated blood pressure in 12-year-old children: evaluation by ambulatory blood pressure monitoring. *Pediatr Res*. 2006; 59 (2):320-4.
37. Davis EF, Lazdam M, Lewandowski AJ, Worton SA, Kelly B, Kenworthy Y, et al. Cardiovascular risk factors in children and young adults born to preeclamptic pregnancies: a systematic review. *Pediatrics*. 2012; 129 (6): e1552-61.
38. Ibanez L, Ong K, Dunger DB, de Zegher F. Early development of adiposity and insulin resistance after catch-up weight gain in small-for-gestational-age children. *J Clin Endocrinol Metab*. 2006; 91 (6):2153-8.
39. Gluckman, P. D., Hanson, M. A., Cooper, C., & Thornburg, K. L. (2008). Effect of in utero and early-life conditions on adult health and disease. *New Eng J Med*, 359(1), 61-73.
40. Bodnar LM, Catov JM, Klebanoff MA, Ness RB, Roberts JM. Prepregnancy body mass index and the occurrence of severe hypertensive disorders of pregnancy. *Epidemiol*. 2007; 18 (2):234-9.
41. Boyd HA, Tahir H, Wohlfahrt J, Melbye M. Associations of personal and family preeclampsia history with the risk of early-, intermediate- and late-onset preeclampsia. *Am J Epidemiol*. 2013; 178 (11):1611-9.

42.Sridhar SB, Darbinian J, Ehrlich SF, et al. Maternal gestational weight gain and offspring risk for childhood overweight or obesity. *Am J Obstet Gynecol* 2014;211:259 e1-8.

43.Laitinen J, Jaaskelainen A, Hartikainen AL, et al. Maternal weight gain during the first half of pregnancy and offspring obesity at 16 years: a prospective cohort study. *BJOG* 2012;119:716-23.

Tables 1: Study sample characteristics at 8-10 years (V1) and 10-12 years (V2)

| <b>Variables</b>                                | <b>Normal weight</b> | <b>Overweight</b>   | <b>Obese</b>        | <b>All</b>         |
|-------------------------------------------------|----------------------|---------------------|---------------------|--------------------|
| Age (years); average (min-max)                  |                      |                     |                     |                    |
| V1                                              | 9.9<br>(8.0- 11.0)   | 9.5<br>(8.0-11.0)   | 9.6<br>(8.0-11.0)   | 9.6<br>(8.0-11.0)  |
| V2                                              | 11.6<br>(9.9- 13.5)  | 11.6<br>(10.0-13.1) | 11.7<br>(9.9-13.5)  | 11.6<br>(9.9-13.5) |
| Boys                                            |                      |                     |                     |                    |
| V1                                              | 198 (58.0 %)         | 71 (21.0 %)         | 72 (36.0 %)         | 341 (55.0 %)       |
| V2                                              | 188 (33.0 %)         | 53 (10.0 %)         | 72 (13.0 %)         | 313 (56.0 %)       |
| Girls                                           |                      |                     |                     |                    |
| V1                                              | 164 (58.0 %)         | 49 (17.0 %)         | 70 (24.0 %)         | 283 (45.0 %)       |
| V2                                              | 149 (60.0 %)         | 44 (18.0 %)         | 54 (22.0 %)         | 247 (44.0 %)       |
| BMI percentile; average (min-max)               |                      |                     |                     |                    |
| V1                                              | 49.5<br>(0.8-84.9)   | 91.5<br>(85.0-91.1) | 99.7<br>(95.0-99.6) | 68.5               |
| V2                                              | 50.7<br>(0.6-84.9)   | 90.9<br>(85.5-94.8) | 97.7<br>(95.1-99.6) | 79.6               |
| Gestational diabetes mellitus                   |                      |                     |                     |                    |
| V1                                              | 55 (8.8 %)           | 21 (3.4 %)          | 22 (3.5 %)          | 100 (16.0 %)       |
| V2                                              | 60 (10.7 %)          | 14 (2.5 %)          | 21 (3.7 %)          | 95 (17.0 %)        |
| Maternal smoking during pregnancy               |                      |                     |                     |                    |
| V1                                              | 41 (6.6 %)           | 23 (3.7 %)          | 37 (5.9%)           | 101 (16.2 %)       |
| V2                                              | 38 (6.8 %)           | 16 (2.8 %)          | 30 (5.3%)           | 84 (15.0 %)        |
| Hypertensive disorders during pregnancy         |                      |                     |                     |                    |
| V1                                              | 40 (6.4%)            | 10 (1.6%)           | 21 (3.4%)           | 71 (11.3 %)        |
| V2                                              | 34 (6.0%)            | 7 (1.0%)            | 19 (3.0%)           | 60 (10.7 %)        |
| <b>Children metabolic syndrome risk factors</b> |                      |                     |                     |                    |
| High waist circumference                        |                      |                     |                     |                    |
| V1                                              | 0 (0.0 %)            | 32 (5.1 %)          | 127 (20.4 %)        | 159 (25.5 %)       |
| V2                                              | 1 (0.1 %)            | 26 (4.6 %)          | 115 (20.5 %)        | 142 (25.3 %)       |
| Fasting hyperglycemia                           |                      |                     |                     |                    |
| V1                                              | 9 (1.4 %)            | 6 (1.0 %)           | 9 (1.4 %)           | 24 (3.8 %)         |
| V2                                              | 17 (3.0 %)           | 9 (1.6 %)           | 10 (1.7 %)          | 36 (6.4 %)         |

|                              |    |             |            |             |              |
|------------------------------|----|-------------|------------|-------------|--------------|
| Hypertension                 |    |             |            |             |              |
|                              | V1 | 0 (0.0 %)   | 0 (0.0 %)  | 0 (0.0 %)   | 0 (0.0 %)    |
|                              | V2 | 0 (0.0 %)   | 0 (0.0 %)  | 0 (0.0 %)   | 0 (0.0 %)    |
| Low high density lipoprotein |    |             |            |             |              |
|                              | V1 | 62 (9.9 %)  | 40 (6.4 %) | 68 (10.9 %) | 171 (27.4 %) |
|                              | V2 | 58 (10.0 %) | 34 (6.0 %) | 66 (12.0 %) | 158 (28.0 %) |
| High triglycerides           |    |             |            |             |              |
|                              | V1 | 2 (0.3 %)   | 6 (1.0 %)  | 17 (2.7 %)  | 25 (4.0 %)   |
|                              | V2 | 3 (0.5 %)   | 3 (0.5 %)  | 17 (3.0 %)  | 23 (4.0 %)   |

Values are n (%), unless otherwise specified.

Table 2: Adjusted multivariate simple logistic regression model assessing the association between anthropometric measures and suboptimal gestational factors in QUALITY cohort and boys and girls at age 8-10 years (Visit1)

| Suboptimal gestational condition                 | Population   | Overweight |           | Obesity     |                  |
|--------------------------------------------------|--------------|------------|-----------|-------------|------------------|
|                                                  |              | OR         | 95% CI    | OR          | 95%CI            |
| Gestational diabetes mellitus                    | All          | 1.14       | 0.65-1.92 | 0.90        | 0.53-1.52        |
|                                                  | Girls        | 1.21       | 0.75-1.93 | 0.55        | 0.49-2.62        |
|                                                  | Boys         | 0.91       | 0.61-1.38 | 0.82        | 0.41-1.61        |
| Hypertensive disorders during pregnancy          | All          | 0.98       | 0.73-1.33 | 1.50        | 0.86-2.62        |
|                                                  | <i>Girls</i> | 0.48       | 0.14-1.67 | 0.77        | 0.29-2.00        |
|                                                  | <i>Boys</i>  | 0.81       | 0.34-1.93 | <b>2.37</b> | <b>1.17-4.80</b> |
| Maternal smoking during pregnancy                | All          | 1.36       | 0.80-2.30 | <b>2.00</b> | <b>1.25-3.20</b> |
|                                                  | Girls        | 1.12       | 0.45-2.78 | <b>2.67</b> | <b>1.30-5.51</b> |
|                                                  | Boys         | 1.47       | 0.76-2.84 | 1.68        | 0.89-3.16        |
| Joint exposure to suboptimal gestational factors | All          | 1.90       | 0.77-1.52 | <b>1.37</b> | <b>1.01-1.86</b> |
|                                                  | Girls        | 0.88       | 0.48-1.6  | 1.41        | 0.85-2.34        |
|                                                  | Boys         | 1.18       | 0.78-1.78 | 1.37        | 0.95-2.06        |

OR= Odd ratio, 95%CI= 95% confidence interval for odd ratio. Logistic regression models are adjusted for parental education. Significance set at p <0.05.

Table 3: Adjusted simple logistic regression model assessing the association between cardiometabolic risk factors and suboptimal gestational factors in QUALITY cohort and boys and girls at age 8-10 years (Visit1)

| Suboptimal gestational condition                 | Population | Waist circumference $\geq 90^{\text{th}}$ percentile |                  | High density lipoprotein $<1.03$ mmol/L |                    |
|--------------------------------------------------|------------|------------------------------------------------------|------------------|-----------------------------------------|--------------------|
|                                                  |            | OR                                                   | 95%CI            | OR                                      | 95% CI             |
| Gestational diabetes mellitus                    | All        | 1.19                                                 | 0.73-1.92        | 1.18                                    | 0.73-1.89          |
|                                                  | Girls      | 1.34                                                 | 0.62-2.90        | 0.89                                    | 0.404-1.963        |
|                                                  | Boys       | 1.22                                                 | 0.65-2.30        | 1.53                                    | 0.840-2.792        |
| Hypertensive disorders during pregnancy          | All        | 1.26                                                 | 0.72-2.18        | 1.40                                    | 0.824-2.390        |
|                                                  | Girls      | 0.44                                                 | 0.16-1.21        | 1.42                                    | 0.655-3.118        |
|                                                  | Boys       | <b>2.58</b>                                          | <b>1.29-5.17</b> | 1.41                                    | 0.675-2.960        |
| Maternal smoking during pregnancy                | All        | <b>1.96</b>                                          | <b>1.24-3.11</b> | 1.29                                    | 0.810-2.077        |
|                                                  | Girls      | <b>2.87</b>                                          | <b>1.41-5.83</b> | 1.26                                    | 0.618-2.595        |
|                                                  | Boys       | 1.60                                                 | 0.85-3.01        | 1.40                                    | 0.748-2.645        |
| Joint exposure to suboptimal gestational factors | All        | <b>1.42</b>                                          | <b>1.06-1.91</b> | 1.32                                    | 0.992-1.771        |
|                                                  | Girls      | 1.33                                                 | 0.82-2.14        | 1.21                                    | 0.759-1.934        |
|                                                  | Boys       | 1.62                                                 | 1.10-2.37        | <b>1.51</b>                             | <b>1.038-2.222</b> |

OR= Odd ratio, 95%CI= 95% confidence interval for odd ratio. Logistic regression models are adjusted for parental education. Significance set at  $p < 0.05$ .

Table 4: Adjusted simple logistic regression model assessing the association between anthropometric measures and suboptimal gestational factors in QUALITY cohort and boys and girls at age 10-12 years (Visit 2)

| Suboptimal gestational condition                 | Population | Overweight |              | Obesity     |                    |
|--------------------------------------------------|------------|------------|--------------|-------------|--------------------|
|                                                  |            | OR         | 95% CI       | OR          | 95%CI              |
| Gestational diabetes mellitus                    | All        | 0.98       | 0.433-1.863  | 0.59        | 0.269-1.324        |
|                                                  | Girls      | 1.15       | 0.385-3.477  | 1.74        | 0.366-3.150        |
|                                                  | Boys       | 0.75       | 0.282-2.033  | 0.39        | 0.098-1.773        |
| Hypertensive disorders of pregnancy              | All        | 0.95       | 0.365-2.477  | 1.05        | 0.439-2.529        |
|                                                  | Girls      | 0.20       | 0.026-1.657  | 0.53        | 0.116-2.462        |
|                                                  | Boys       | 3.16       | 0.888-11.314 | 1.71        | 0.557-5.299        |
| Maternal smoking during pregnancy                | All        | 1.30       | 0.607-2.819  | <b>2.29</b> | <b>1.262-4.160</b> |
|                                                  | Girls      | 1.54       | 0.483-4.905  | <b>2.87</b> | <b>1.173-7.039</b> |
|                                                  | Boys       | 1.18       | 0.421-3.326  | 1.90        | 0.851-4.250        |
| Joint exposure to suboptimal gestational factors | All        | 0.92       | 0.582-1.463  | <b>1.63</b> | <b>1.153-2.327</b> |
|                                                  | Girls      | 0.97       | 0.485-1.956  | 1.52        | 0.849-2.750        |
|                                                  | Boys       | 0.88       | 0.476-1.643  | <b>1.73</b> | <b>1.110-2.710</b> |

OR= Odd ratio, 95%CI= 95% confidence interval for odd ratio. Logistic regression models are adjusted for parental education. Significance set at p <0.05.

Table 5: Adjusted simple logistic regression model assessing the association between cardiometabolic risk factors and suboptimal gestational factors in QUALITY cohort and boys and girls at age 10-12 years (Visit2)

| Suboptimal gestational condition                 | Population | Waist circumference $\geq$ 90 <sup>th</sup> percentile |              | High density lipoprotein $<$ 1.03 mmol/L |                    |
|--------------------------------------------------|------------|--------------------------------------------------------|--------------|------------------------------------------|--------------------|
|                                                  |            | OR                                                     | 95%CI        | OR                                       | 95% CI             |
| Gestational diabetes mellitus                    | All        | 1.37                                                   | 0.532-3.531  | 0.96                                     | 0.518-1.808        |
|                                                  | Girls      | 1.46                                                   | 0.386-5.558  | 1.24                                     | 0.498-3.091        |
|                                                  | Boys       | 1.42                                                   | 0.365-5.580  | 0.79                                     | 0.336-1.902        |
| Hypertensive disorders during pregnancy          | All        | 0.81                                                   | 0.183-3.642  | 0.93                                     | 0.381-2.295        |
|                                                  | Girls      | 0.54                                                   | 0.068-4.62   | 0.45                                     | 0.097-2.125        |
|                                                  | Boys       | 1.30                                                   | 1.152-11.201 |                                          |                    |
| Maternal smoking during pregnancy                | All        | 2.10                                                   | 0.875-5.080  | 1.71                                     | 0.953-3.102        |
|                                                  | Girls      | 2.78                                                   | 0.868-8.906  | 2.12                                     | 0.871-5.158        |
|                                                  | Boys       | 1.69                                                   | 0.422-6.807  | 1.47                                     | 0.664-3.262        |
| Joint exposure to suboptimal gestational factors | All        | 1.41                                                   | 0.826-2.443  | <b>1.45</b>                              | <b>1.040-2.031</b> |
|                                                  | Girls      | 1.24                                                   | 0.558-2.767  | 0.71                                     | 0.427-1.210        |
|                                                  | Boys       | 1.73                                                   | 0.818-3.692  | 1.05                                     | 0.642-1.725        |

OR= Odd ratio, 95%CI= 95% confidence interval for odd ratio. Logistic regression models are adjusted for parental education. Significance set at  $p < 0.05$ .



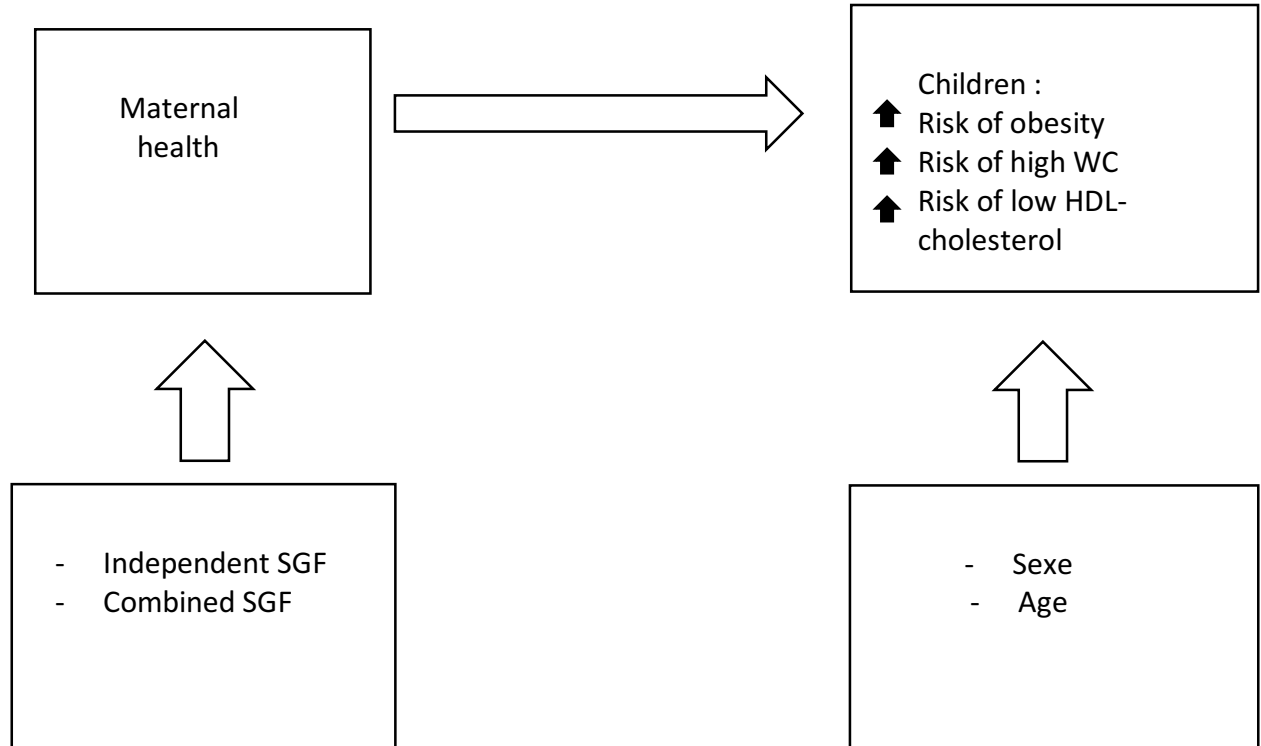

Figure 1: New insight on the impact of suboptimal gestational factors on adipose and cardiometabolic outcomes in children.
